# Supplementary material
Source: MDPI journal article supplement (https://www.mdpi.com/2073-4344/11/5/549)
Supplement: s1 [file s1]

## Supplementary Materials

# Oxidation of Aqueous Toluene by Gas-Phase Pulsed Corona Discharge in Air-Water Mixtures Followed by Photocatalytic Exhaust Air Cleaning

Maarja Kask \*, Marina Krichevskaya, Sergei Preis and Juri Bolobajev \*

Department of Materials and Environmental Technology, Tallinn University of Technology, Ehitajate Tee 5, 19086 Tallinn, Estonia; marina.kritsevskaja@taltech.ee (M.K.); sergei.preis@taltech.ee (S.P.)

\* Correspondence: maarja.kask@taltech.ee (M.K.); juri.bolobajev@taltech.ee (J.B.)

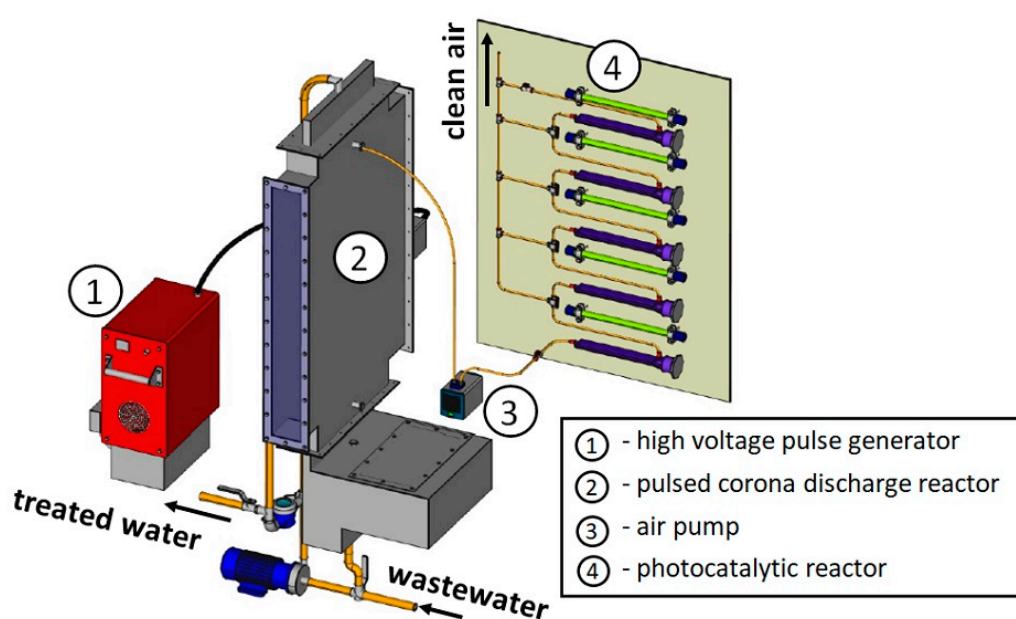

Figure S1. 3D illustration of combined PCD and photocatalytic reactor

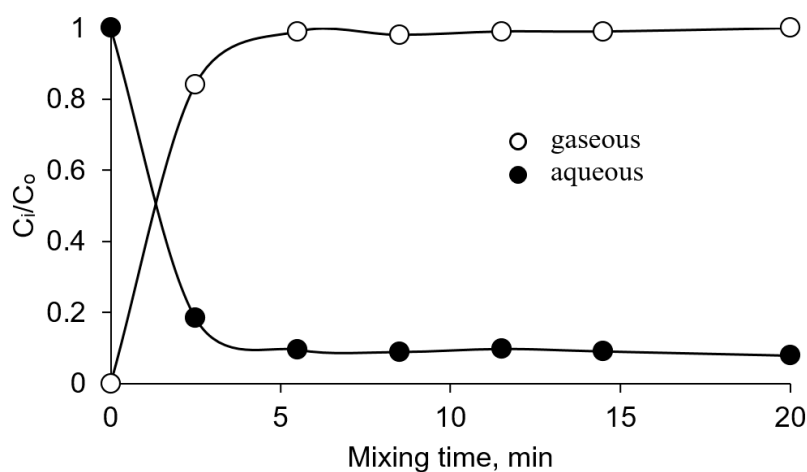

Figure S2. Equilibrium between liquid and gaseous phase of toluene in time:  $C_0 = 50 \text{ mg}\cdot\text{L}^{-1}$ , pH 7.0
